# Supplementary material for: Additional Blue LED during Cultivation Induces Cold Tolerance in Tomato Fruit but Only to an Optimum
Source: MDPI journal article supplement (doi:10.3390/biology11010101), 2022-01-09
Supplement: s1 [file s1]

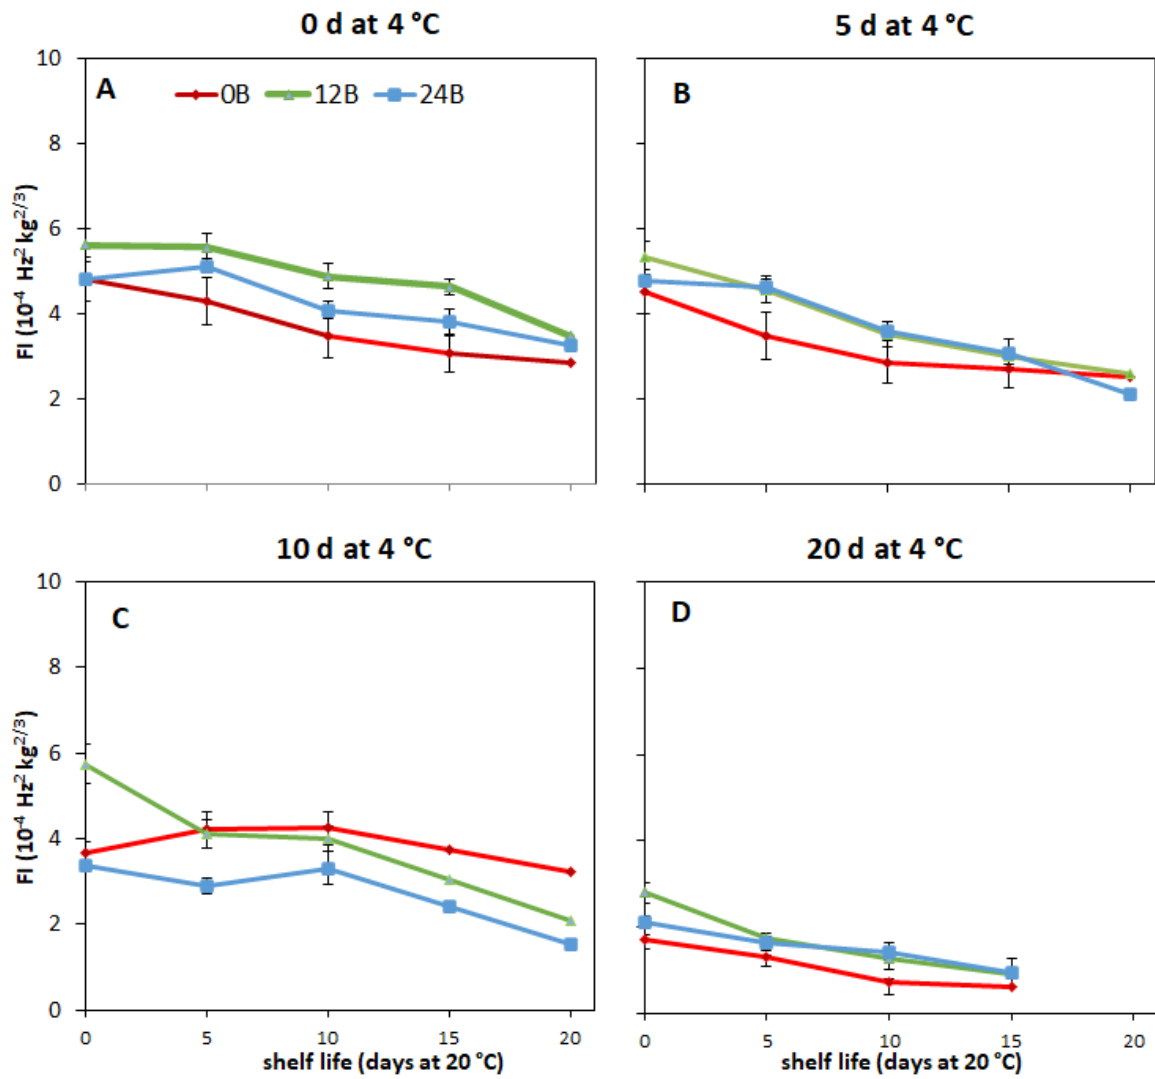

**Figure S1.** Average firmness index with indicated standard error during shelf life (20 °C) for five red (R) tomatoes per cold storage duration.
